# Supplementary material
Source: publisher figshare collection journal article supplement (https://acs.figshare.com/ndownloader/files/4133068)
Supplement: Supplementary file 1 [file 4133068]

Supporting information for

**A cooperative mechanism for the diffusion of  $\text{Li}^+$  ions in  
 $\text{LiMgSO}_4\text{F}$**

M. Salanne<sup>1</sup>, D. Marrocchelli<sup>2</sup>, and G.W. Watson<sup>2</sup>

<sup>1</sup> *UPMC Univ Paris 06, CNRS, ESPCI,*

*UMR 7195, PECSA, F-75005 Paris, France and*

<sup>2</sup> *School of Chemistry, Trinity College Dublin, Dublin 2, Ireland*

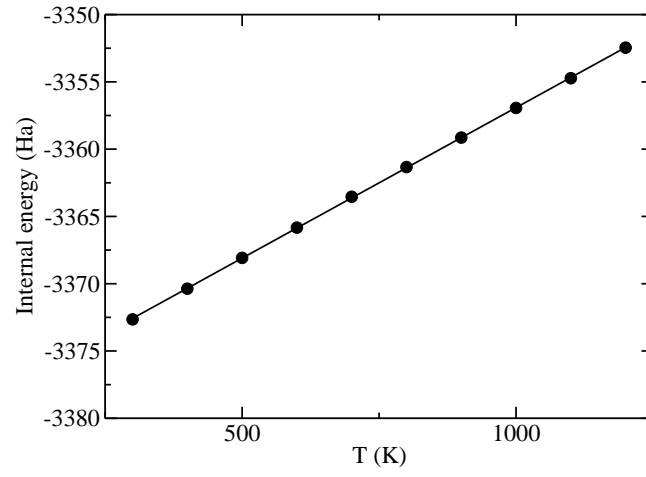

FIG. 1: The average internal energy varies linearly with respect to the temperature for a given volume (cell 1); the heat capacity  $C_V$  is therefore constant over the whole range of temperature.
